# Supplementary material for: Underestimation of denitrification rates from field application of the 15 N gas flux method and its correction by gas diffusion modelling
Source: Copernicus journal article supplement (doi:10.5194/bg-2018-495), 2018-12-13
Supplement: Supplementary file 1 [file bg-2018-495-supplement.pdf]

# Underestimation of denitrification rates from field application of the $^{15}\text{N}$ gas flux method and its correction by gas diffusion modelling

Reinhard Well<sup>1</sup>, Martin Maier<sup>2</sup>, Dominika Lewicka-Szczebak<sup>1</sup>, Jan-Reent Köster<sup>1</sup>; and Nicolas Ruoss<sup>1</sup>

<sup>1</sup>Thünen Institute, Climate-Smart Agriculture, Braunschweig, Germany

5 <sup>2</sup>Forest Research Institute Baden-Württemberg, Dep. Soil and Environment, Freiburg, Germany

Correspondence to: Reinhard Well (reinhard.well@thuenen.de)

## Supplement

Table S1: Soil data (WFPS = water-filled pores space; means $\pm$  standard deviation of four replicate micro-plots)

| Depth of sample          | WFPS           | $\text{NO}_3^-$       | $\text{NH}_4^+$       | $^{15}\text{N}$ atom<br>fraction of<br>$\text{NO}_3^-$ | Bulk<br>density    |
|--------------------------|----------------|-----------------------|-----------------------|--------------------------------------------------------|--------------------|
|                          | %              | mg N kg <sup>-1</sup> | mg N kg <sup>-1</sup> |                                                        | g cm <sup>-3</sup> |
| <b>0-10 cm</b>           | 71.8 $\pm$ 2.6 | 16.6 $\pm$ 1.9        | 1.76 $\pm$ 1.05       | 0.092 $\pm$ 0.014                                      | 1.48               |
| <b>10-20 cm</b>          | 61.5 $\pm$ 2.4 | 14.4 $\pm$ 2.5        | 0.81 $\pm$ 0.32       | 0.150 $\pm$ 0.045                                      | 1.54               |
| <b>20-30 cm</b>          | 60.0 $\pm$ 1.5 | 16.6 $\pm$ 4.1        | 0.70 $\pm$ 0.18       | 0.201 $\pm$ 0.045                                      | 1.48               |
| <b>0-30 cm (average)</b> | 64.4 $\pm$ 1.7 | 15.9 $\pm$ 2.5        | 1.1 $\pm$ 0.4         | 0.148 $\pm$ 0.030                                      | 1.50               |

10

**Table S2: Field fluxes of pool-derived N<sub>2</sub>, N<sub>2</sub>O and N<sub>2</sub>+N<sub>2</sub>O, residual fraction of N<sub>2</sub>O remaining after N<sub>2</sub>O reduction to N<sub>2</sub> (*r<sub>N2O</sub>*) and <sup>15</sup>N enrichment of the <sup>15</sup>N-labelled N pool producing N<sub>2</sub>O (*a<sub>p,N2O</sub>*) with bottom open and bottom closed (individual replicates and mean values ± standard deviation). Unequal uppercase letter indicate significant (P<0.05) differences between mean values with bottom open and bottom closed.**

5

| <b>ID</b>                  | <b>N<sub>2</sub> flux</b>            | <b>N<sub>2</sub>O flux</b>           | <b>N<sub>2</sub>+N<sub>2</sub>O flux</b> | <b>r<sub>N2O</sub></b>    | <b>a<sub>p,N2O</sub></b>  |
|----------------------------|--------------------------------------|--------------------------------------|------------------------------------------|---------------------------|---------------------------|
|                            | g N ha <sup>-1</sup> d <sup>-1</sup> | g N ha <sup>-1</sup> d <sup>-1</sup> | g N ha <sup>-1</sup> d <sup>-1</sup>     |                           |                           |
| Cylinder 1 / bottom open   | 286.3                                | 62.1                                 | 348.4                                    | 0.178                     | 0.126                     |
| Cylinder 2 / bottom open   | 436.0                                | 73.9                                 | 509.9                                    | 0.145                     | 0.194                     |
| Cylinder 3/ bottom open    | 763.9                                | 237.6                                | 1001.4                                   | 0.237                     | 0.113                     |
| Cylinder 4 / bottom open   | 488.2                                | 9.6                                  | 497.8                                    | 0.019                     | 0.174                     |
| average, bottom open       | 493.6 <sup>a</sup> ±199.5            | 95.8 <sup>a</sup> ±98.5              | 589.4 <sup>a</sup> ±284.3                | 0.145 <sup>a</sup> ±0.092 | 0.152 <sup>a</sup> ±0.038 |
| Cylinder 1 / bottom closed | 349.9                                | 139.4                                | 489.3                                    | 0.285                     | 0.120                     |
| Cylinder 2 / bottom closed | 776.2                                | 30.3                                 | 806.5                                    | 0.038                     | 0.202                     |
| Cylinder 3/ bottom closed  | 1150.7                               | 170.7                                | 1321.3                                   | 0.129                     | 0.121                     |
| Cylinder 4 / bottom closed | 540.0                                | 62.5                                 | 602.5                                    | 0.104                     | 0.177                     |
| average, bottom closed     | 704.2 <sup>a</sup> ±345.0            | 100.7 <sup>a</sup> ±65.4             | 804.9 <sup>b</sup> ±368.5                | 0.139 <sup>a</sup> ±0.105 | 0.155 <sup>a</sup> ±0.041 |

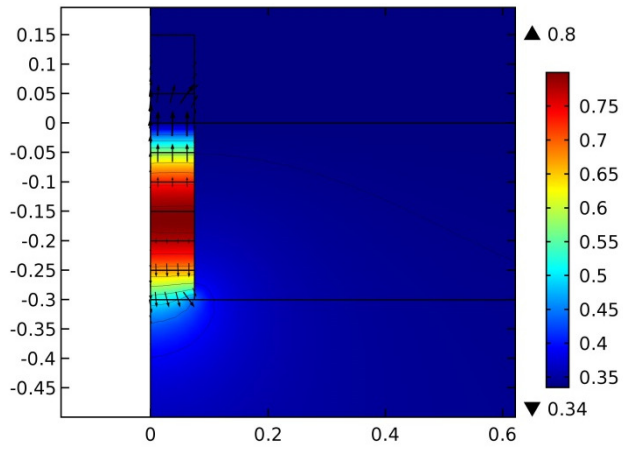

**Figure S1: Simulation of concentrations (colours, ppm) and fluxes (arrows) with open chamber at steady state.**

5

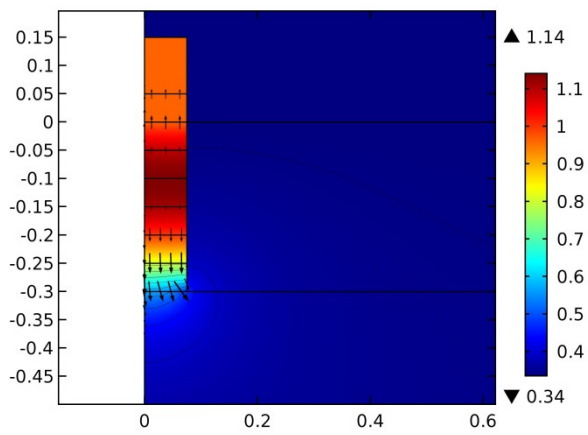

**Figure S2: Simulation of concentrations (colours, ppm) and fluxes (arrows) 5 hours after chamber closure.**

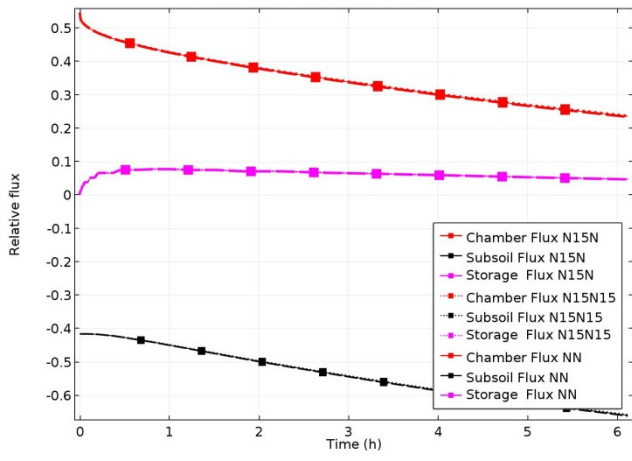

5

Figure S3 Relative fluxes of N<sub>2</sub> isotopologues (<sup>14</sup>N<sup>14</sup>N, <sup>15</sup>N<sup>14</sup>N, <sup>15</sup>N<sup>15</sup>N) following chamber closing.
